# Supplementary material
Source: publisher site journal article supplement (https://www.dovepress.com/article/243660)
Supplement: Supplementary file 1 [file get_supplementary_file.php]

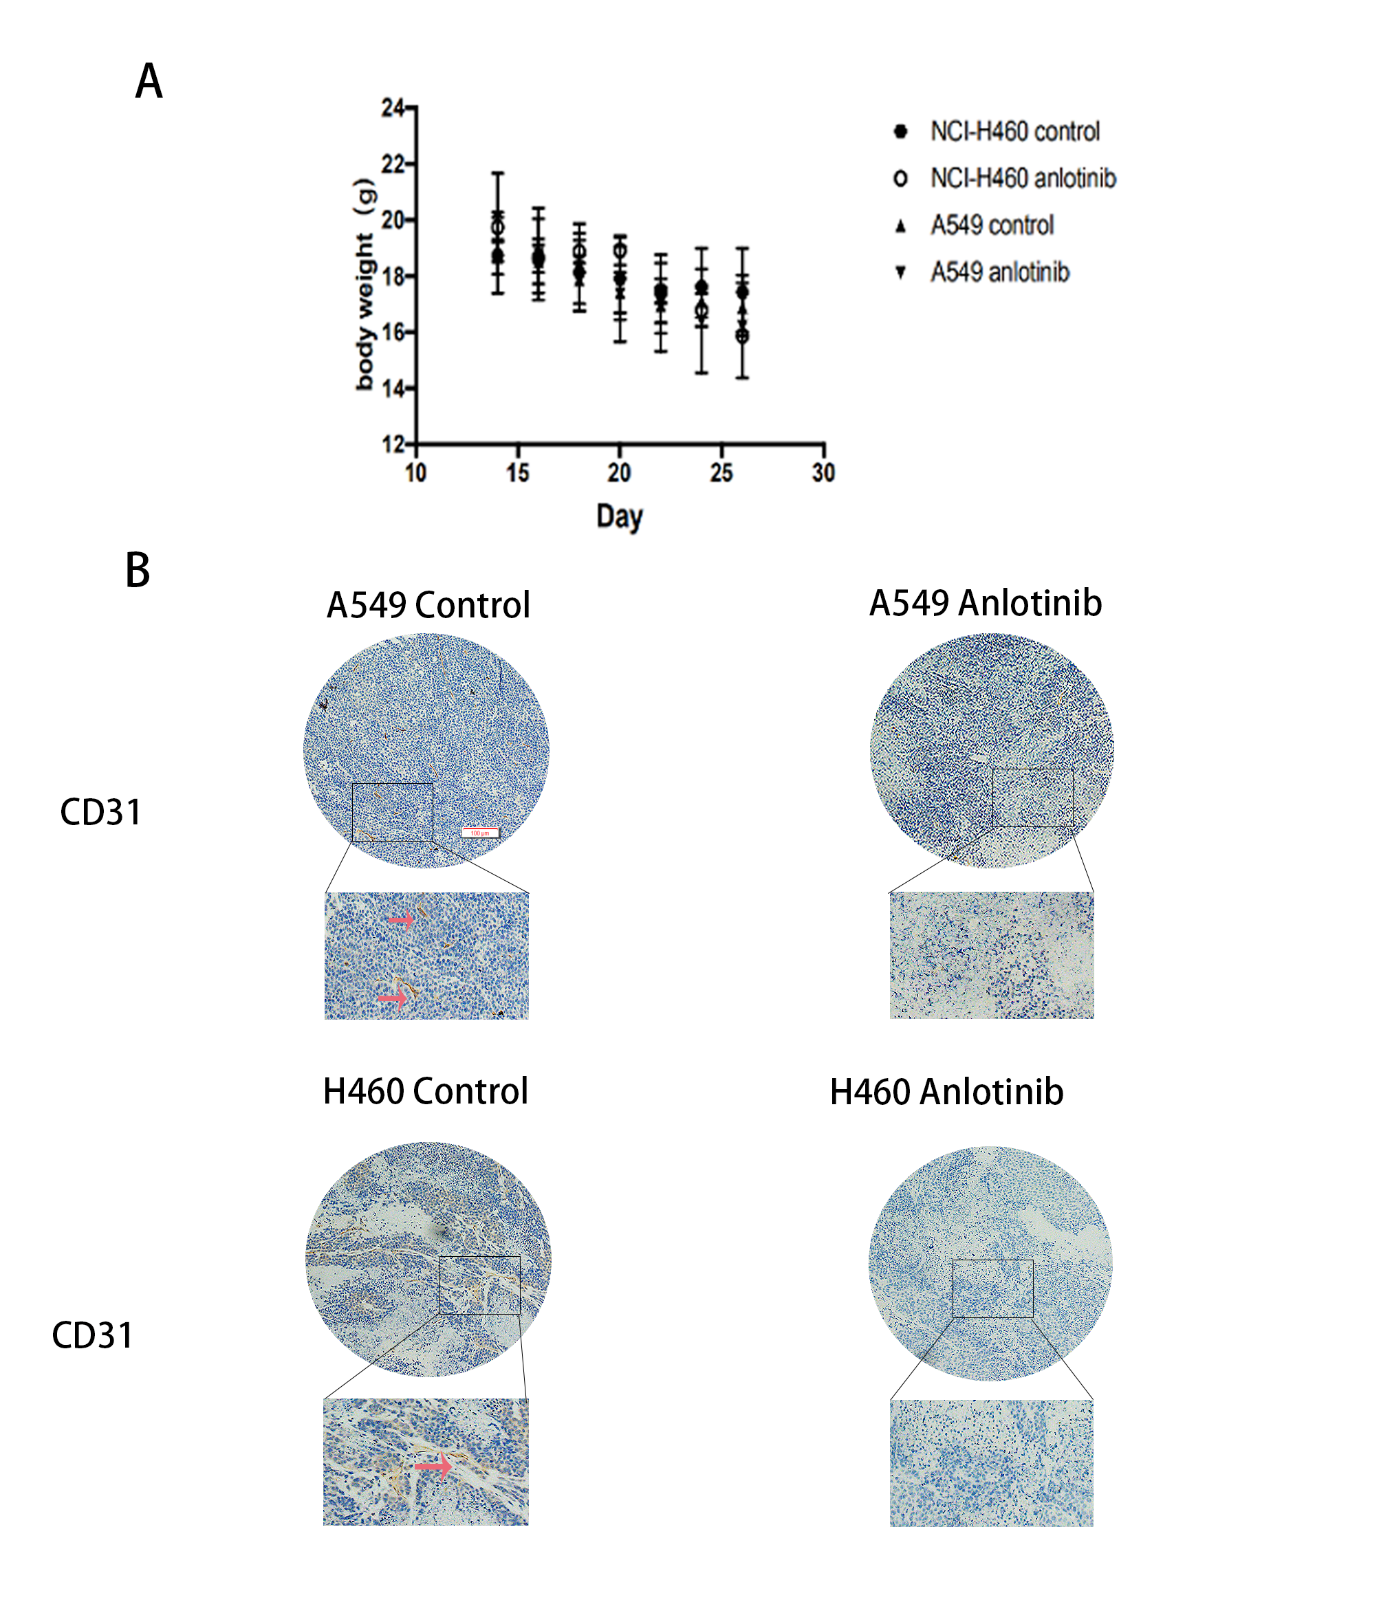


**Supplementary Figure 1. Anlotinib exerts anti-cancer effectsin vivo.** (A) Body weight of NCI-H460 and A549 cells bearing mice. (B) IHC detection of CD31 expression in tumor tissues of NCI-H460 and A549 cells bearing mice. Scale bar=100 um
